# Supplementary material for: Serum Metabolites Associated with Muscle Hypertrophy after 8 Weeks of High- and Low-Load Resistance Training
Source: MDPI journal article supplement (doi:10.3390/metabo13030335), 2023-02-24
Supplement: s1 [file s1]

**Table 1.** Dietary intake

| Protocol | Kcal       |            | CHO (g)  |           | PRO (g) |          | LIP (g) |         |
|----------|------------|------------|----------|-----------|---------|----------|---------|---------|
|          | Pre        | Pos        | Pre      | Pos       | Pre     | Pos      | Pre     | Pos     |
| HL-RT    | 1952 ± 548 | 2098 ± 807 | 246 ± 96 | 261 ± 111 | 88 ± 32 | 92 ± 56  | 64 ± 33 | 74 ± 52 |
| LL-RT    | 1836 ± 586 | 1785 ± 454 | 225 ± 97 | 210 ± 71  | 90 ± 36 | 101 ± 36 | 61 ± 24 | 55 ± 23 |

Kcal = total caloric consumption, CHO = carbohydrate consumption, PRO = protein consumption, LIP = lipid consumption, HL-RE = high-load resistance training, LL-RT = low-load resistance training, g = grams, Pre = day before the first training session, Pos = day before the last training session.

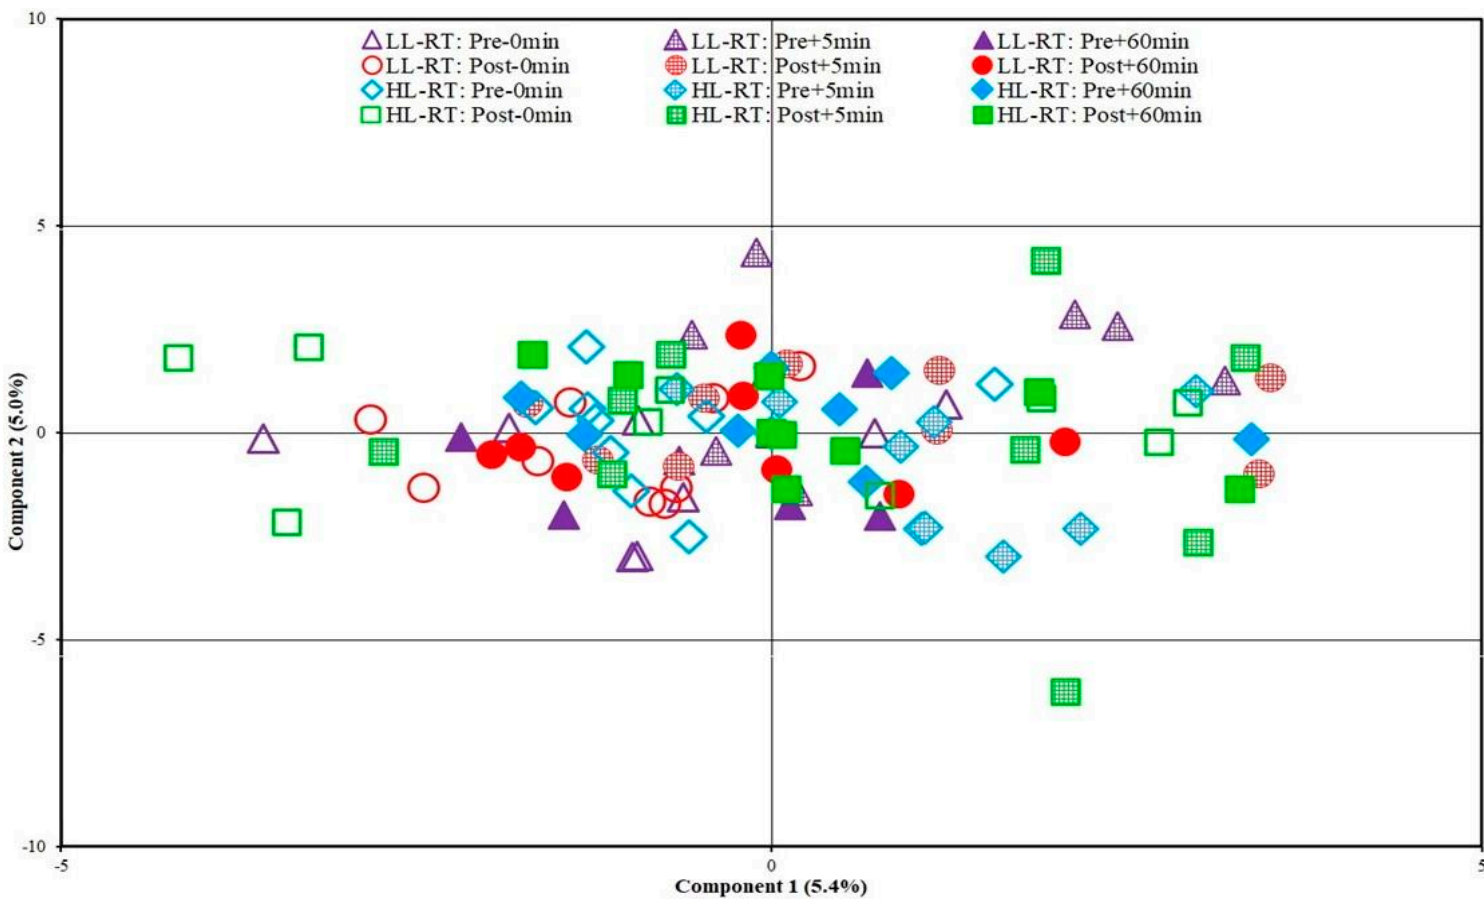

Figure1. Principal Component Analysis (PCA).
